# Supplementary material for: The Light and Shadow of Rapid Serological Tests for SARS-CoV-2 Infection: Results from a Study in a Large Emergency Department
Source: PubMed Central journal article supplement (PMC7558531; doi:10.3390/ijerph17186493), 2020-09-07
Supplement: ijerph-17-06493-s001.pdf [file ijerph-17-06493-s001.pdf]

**Supplementary material.**

**Table S1.** Results of serological and molecular tests for SARS-CoV-2 for all enrolled patients.

| No. of patients | Real-time PCR   | IgM | IgG |
|-----------------|-----------------|-----|-----|
| <i>n</i> = 148  | <b>Positive</b> |     |     |
|                 | <i>n</i> = 47   | +   | +   |
|                 | <i>n</i> = 4    | +   | -   |
|                 | <i>n</i> = 1    | -   | +   |
|                 | <i>n</i> = 96   | -   | -   |
| <i>n</i> = 671  | <b>Negative</b> |     |     |
|                 | <i>n</i> = 653  | -   | -   |
|                 | <i>n</i> = 12   | +   | +   |
|                 | <i>n</i> = 6    | +   | -   |
|                 | <i>n</i> = 0    | -   | +   |

PCR, polymerase chain reaction.
